# Supplementary material
Source: publisher site journal article supplement (https://www.dovepress.com/article/245817)
Supplement: Supplementary file 1 [file get_supplementary_file.php]

Supplemental Table 1. Definitions of comorbidities

| Comorbidity | ICD-9-CM codes |
| --- | --- |
| Hypertension | 401–405 |
| Diabetes mellitus | 250 |
| Hyperlipidemia | 272.0–272.4, 272.9 |
| Ischemic heart disease | 410–414 |
| Atrial fibrillation | 427.31 |
| Heart failure | 428 |
| COPD | 490–492 |
| Chronic kidney disease | 585 |
| Liver diseases | 571, 572, 573 |
| Cancer | 140–239 |
| Depression | 296.2, 296.3, 300.4, 311 |

**Abbreviations:** COPD, chronic obstructive pulmonary disease; ICD-9-CM, International Classification of Diseases, Ninth Edition, Clinical Modification

Supplemental Table 2. Comparisons of characteristics between participants and those lost to follow-up

|  | 90-day mRS | |  |  | | 180-day mRS | |  |  | 365-day mRS | |  |
| --- | --- | --- | --- | --- | --- | --- | --- | --- | --- | --- | --- | --- |
| Available | Unavailable | *P* |  | | Available | Unavailable | *P* |  | Available | Unavailable | *P* |
| N = 6,809 | N = 1,150 | N = 6,694 | N = 1,265 | N = 4,330 | N = 3,629 |
| Age, mean (SD) | 72.3 (11.2) | 68.8 (15.9) | <0.001 |  | | 72.3 (11.2) | 68.9 (15.5) | <0.001 |  | 73.2 (11.1) | 70.1 (12.8) | <0.001 |
| Female | 3,006 (44.1) | 469 (40.8) | 0.033 |  | | 2,959 (44.2) | 516 (40.8) | 0.025 |  | 1,893 (43.7) | 1,582 (43.6) | 0.911 |
| Stroke type |  |  | <0.001 |  | |  |  | <0.001 |  |  |  | 0.001 |
| Ischemic | 1,216 (17.9) | 264 (23.0) |  |  | | 1,201 (17.9) | 279 (22.1) |  |  | 865 (20.0) | 615 (16.9) |  |
| Hemorrhagic | 5203 (76.4) | 822 (71.5) |  |  | | 5,108 (76.3) | 917 (72.5) |  |  | 3,208 (74.1) | 2,817 (77.6) |  |
| TIA | 390 (5.7) | 64 (5.6) |  |  | | 385 (5.8) | 69 (5.5) |  |  | 257 (5.9) | 197 (5.4) |  |
| Comorbidity |  |  |  |  | |  |  |  |  |  |  |  |
| Hypertension | 5,518 (81.0) | 901 (78.3) | 0.033 |  | | 5,419 (81.0) | 1,000 (79.1) | 0.116 |  | 3,508 (81.0) | 2,911 (80.2) | 0.367 |
| Diabetes | 2,798 (41.1) | 458 (39.8) | 0.419 |  | | 2,748 (41.1) | 508 (40.2) | 0.553 |  | 1,827 (42.2) | 1,429 (39.4) | 0.011 |
| Hyperlipidemia | 2,465 (36.2) | 397 (34.5) | 0.272 |  | | 2409 (36.0) | 453 (35.8) | 0.904 |  | 1,520 (35.1) | 1,342 (37.0) | 0.082 |
| IHD | 1,550 (22.8) | 235 (20.4) | 0.080 |  | | 1,527 (22.8) | 258 (20.4) | 0.059 |  | 1,022 (23.6) | 763 (21.0) | 0.006 |
| Atrial fibrillation | 855 (12.6) | 136 (11.8) | 0.488 |  | | 844 (12.6) | 147 (11.6) | 0.329 |  | 571 (13.2) | 420 (11.6) | 0.030 |
| Cancer | 848 (12.5) | 164 (14.3) | 0.089 |  | | 844 (12.6) | 168 (13.3) | 0.510 |  | 547 (12.6) | 465 (12.8) | 0.810 |
| Heart failure | 719 (10.6) | 118 (10.3) | 0.760 |  | 713 (10.7) | | 124 (9.8) | 0.367 |  | 505 (11.7) | 332 (9.1) | <0.001 |
| COPD | 696 (10.2) | 106 (9.2) | 0.295 |  | 682 (10.2) | | 120 (9.5) | 0.447 |  | 475 (11.0) | 327 (9.0) | 0.004 |
| Liver diseases | 601 (8.8) | 100 (8.7) | 0.885 |  | 590 (8.8) | | 111 (8.8) | 0.964 |  | 389 (9.0) | 312 (8.6) | 0.545 |
| CKD | 315 (4.6) | 63 (5.5) | 0.209 |  | 317 (4.7) | | 61 (4.8) | 0.894 |  | 232 (5.4) | 146 (4.0) | 0.005 |
| Depression | 290 (4.3) | 52 (4.5) | 0.685 |  | 288 (4.3) | | 54 (4.3) | 0.957 |  | 181 (4.2) | 161 (4.4) | 0.574 |
| NIHSS, median (IQR) | 5 (2–14) | 6 (3–14) | 0.087 |  | 5 (2–15) | | 5 (3–12) | 0.549 |  | 6 (3–19) | 5 (2–10) | <0.001 |

**Notes:** Data are numbers (percentage) unless specified otherwise.

**Abbreviations:** CKD, chronic kidney disease; COPD, chronic obstructive pulmonary disease; IHD, ischemic heart disease; IQR, interquartile range; mRS, modified Rankin Scale; NIHSS, National Institutes of Health Stroke Scale; SD, standard deviation; TIA, transient ischemic attack.

Supplemental Table 3. Distribution of home-times across mRS scores at 90, 180, and 365 days in all patients and subgroup of patients

|  |  |  | All | |  | Ischemic stroke | |  | Hemorrhagic stroke | |  | TIA | |
| --- | --- | --- | --- | --- | --- | --- | --- | --- | --- | --- | --- | --- | --- |
|  | mRS |  | N | Home-time,  Median (IQR) |  | N | Home-time,  Median (IQR) |  | N | Home-time,  Median (IQR) |  | N | Home-time,  Median (IQR) |
| 90 days | 0 |  | 1147 | 85 (84–87) |  | 825 | 85 (84–87) |  | 108 | 83 (79–85) |  | 214 | 86 (85–87) |
|  | 1 |  | 1301 | 85 (82–86) |  | 1095 | 85 (83–86) |  | 123 | 83 (77–85) |  | 83 | 86 (85–87) |
|  | 2 |  | 942 | 83 (79–85) |  | 794 | 83 (80–85) |  | 114 | 81 (74–84) |  | 34 | 85 (81–86) |
|  | 3 |  | 740 | 80 (73–84) |  | 612 | 81 (75–84) |  | 102 | 75 (61–81) |  | 26 | 82 (72–86) |
|  | 4 |  | 1021 | 75 (62–82) |  | 818 | 76 (65–82) |  | 188 | 66 (52–77) |  | 15 | 79 (68–86) |
|  | 5 |  | 815 | 58 (33–74) |  | 591 | 61 (39–76) |  | 213 | 47 (19–67) |  | 11 | 72 (5–84) |
|  | 6 |  | 843 | 0 (0–5) |  | 468 | 0 (0–16) |  | 368 | 0 (0–0) |  | 7 | 65 (48–85) |
| 180 days | 0 |  | 1348 | 175 (173–176) |  | 991 | 175 (173–176) |  | 134 | 173 (168–175) |  | 223 | 176 (174–177) |
|  | 1 |  | 1228 | 175 (171–176) |  | 1035 | 175 (172–176) |  | 129 | 172 (166–175) |  | 64 | 176 (173–177) |
|  | 2 |  | 812 | 172 (167–175) |  | 685 | 173 (168–175) |  | 92 | 168 (161–173) |  | 35 | 173 (168–176) |
|  | 3 |  | 673 | 169 (160–173) |  | 553 | 170 (162–174) |  | 96 | 162 (146–170) |  | 24 | 171 (161–176) |
|  | 4 |  | 817 | 162 (148–170) |  | 655 | 164 (151–171) |  | 151 | 153 (133–165) |  | 11 | 167 (155–176) |
|  | 5 |  | 742 | 144 (106–160) |  | 539 | 147 (115–162) |  | 192 | 129 (87–153) |  | 11 | 154 (92–170) |
|  | 6 |  | 1074 | 0 (0–33) |  | 650 | 7 (0–58) |  | 407 | 0 (0–0) |  | 17 | 90 (50–112) |
| 365 days | 0 |  | 700 | 360 (357–362) |  | 491 | 360 (357–362) |  | 77 | 358 (352–360) |  | 132 | 361 (359–362) |
|  | 1 |  | 625 | 359 (355–361) |  | 531 | 360 (355–361) |  | 58 | 358 (354–360) |  | 36 | 360 (355–362) |
|  | 2 |  | 436 | 356 (350–360) |  | 355 | 357 (350–360) |  | 54 | 354 (342–357) |  | 27 | 358 (349–361) |
|  | 3 |  | 374 | 353 (344–358) |  | 301 | 353 (345–358) |  | 56 | 348 (327–354) |  | 17 | 356 (350–359) |
|  | 4 |  | 390 | 347 (332–354) |  | 317 | 349 (335–355) |  | 64 | 340 (324–351) |  | 9 | 337 (316–339) |
|  | 5 |  | 367 | 323 (285–346) |  | 266 | 330 (298–349) |  | 91 | 304 (236–334) |  | 10 | 328 (276–342) |
|  | 6 |  | 1438 | 9 (0–128) |  | 947 | 42 (0–165) |  | 465 | 0 (0–2) |  | 26 | 109 (55–175) |

**Abbreviations:** IQR, interquartile range; mRS, modified Rankin Scale; TIA, transient ischemic attack.

Supplemental Table 4. Odds ratios and confidence intervals of the baseline characteristics in predicting functional outcome at 90 days represented by home-time or mRS score in all study patients

|  | Poor outcome | |
| --- | --- | --- |
|  | Home-time ≤ cut-off value | mRS score 3–6 |
| Age | 1.01 (1.00–1.01)a | 1.05 (1.04–1.06)a |
| Female | 0.98 (0.87–1.11) | 0.80 (0.70–0.91)a |
| Comorbidity |  |  |
| Hypertension | 0.80 (0.69–0.93)a | 0.90 (0.77–1.06) |
| Diabetes | 1.18 (1.05–1.33)a | 1.40 (1.23–1.58)a |
| Hyperlipidemia | 0.75 (0.66–0.85)a | 0.76 (0.66–0.86)a |
| IHD | 1.35 (1.17–1.56)a | 0.91 (0.78–1.06) |
| Atrial fibrillation | 1.29 (1.08–1.55)a | 0.78 (0.64–0.96)a |
| Cancer | 1.42 (1.20–1.69)a | 0.99 (0.82–1.19) |
| Heart failure | 1.26 (1.03–1.54)a | 1.20 (0.97–1.50) |
| COPD | 1.00 (0.83–1.21) | 0.96 (0.78–1.17) |
| Liver diseases | 0.97 (0.79–1.20) | 0.91 (0.73–1.14) |
| CKD | 1.52 (1.14–2.02)a | 1.80 (1.31–2.46)a |
| Depression | 1.08 (0.82–1.43) | 1.16 (0.86–1.56) |
| NIHSS | 1.16 (1.15–1.17)a | 1.23 (1.22–1.25)a |

**Notes:** a Significant predictors.

**Abbreviations:** CKD, chronic kidney disease; COPD, chronic obstructive pulmonary disease; IHD, ischemic heart disease; mRS, modified Rankin Scale; NIHSS, National Institutes of Health Stroke Scale; TIA, transient ischemic attack.
